**Longitudinal assessment of sputum microbiome by sequencing of the 16S rRNA gene  
in non-CF bronchiectasis patients**

Michael J Cox<sup>1</sup> PhD

Elena M Turek<sup>1</sup> BSc

Catherine Hennessy<sup>2</sup> BSc

Ghazala K Mirza<sup>1</sup> BSc

Phillip L James<sup>1,2</sup> PhD

Meg Coleman<sup>2</sup> MBBS

Andrew Jones<sup>2</sup> MD

Robert Wilson<sup>2</sup> FRCP

Diana Bilton<sup>1,2</sup> FRCP

William O.C. Cookson<sup>1,2\*</sup> MD

Miriam F. Moffatt<sup>1\*</sup> DPhil

Michael Loebinger<sup>1,2\*</sup> FRCP

<sup>1</sup>National Heart and Lung Institute, Imperial College London, UK, SW3 6LY

<sup>2</sup>Royal Brompton and Harefield NHS Foundation Trust, London, UK,

\*These authors contributed equally to the study leadership

**Conflict of interest:** DB received a grant from Novartis UK for sequencing costs. The funders had no involvement in study design, collection or analysis of data, or in the decision to publish.

**Running Title:** Microbiome in Non-CF Bronchiectasis

**Addresses for correspondence:**

Professor Miriam F. Moffatt  
Imperial College London  
Royal Brompton Campus  
Dovehouse St, London SW3 6LY  
Phone: +44 20 7594 2942  
Email: [m.moffatt@imperial.ac.uk](mailto:m.moffatt@imperial.ac.uk)

Dr Michael Loebinger  
Royal Brompton NHS Trust  
Dept. of Respiratory Infection  
Fullham Road London SW3 6NP  
Phone: +44 20 7351 8337  
Email: [m.loebinger@imperial.ac.uk](mailto:m.loebinger@imperial.ac.uk)

---

2 **Abstract**

3 Bronchiectasis is accompanied by chronic bronchial infection that may drive disease progression.  
4 However, the evidence base for antibiotic therapy is limited. DNA based methods offer better  
5 identification and quantification of microbial constituents of sputum than standard clinical culture and  
6 may help inform patient management strategies. Our study objective was to determine the longitudinal  
7 variability of the non-CF bronchiectasis microbiome in sputum with respect to clinical variables.

8 Eighty-five patients with non-cystic fibrosis (CF) bronchiectasis and daily sputum production were  
9 recruited from outpatient clinics and followed for six months. Monthly sputum samples and clinical  
10 measurements were taken, together with additional samples during exacerbations. 16S rRNA gene  
11 sequencing of the sputum microbiota was successful for 381 samples from 76 patients and analysed  
12 in conjunction with clinical data.

13 Microbial communities were highly individual in composition and stability, usually with limited diversity  
14 and often containing multiple pathogens. When compared to DNA sequencing, microbial culture had  
15 restricted sensitivity in identifying common pathogens. With some exceptions, community  
16 characteristics showed poor correlations with clinical features including underlying disease, antibiotic  
17 use and exacerbations.

18 The use of microbial community analysis of sputum added to information from microbial culture. A  
19 simple model of exacerbations driven by bacterial overgrowth was not supported, suggesting a need  
20 for revision of principles for antibiotic therapy. In individual patients, the management of chronic  
21 bronchial infection may be improved by therapy specific to their microbiome, taking into account  
22 pathogen load, community stability, and acute and chronic community responses to antibiotics.

23

---

24 **Introduction**

25 Bronchiectasis is characterised by abnormal dilated thick-walled bronchi and is often accompanied by  
26 chronic bronchial infection. Patients with advanced disease may produce copious volumes of purulent  
27 sputum and lung function may be severely and progressively impaired. The prevalence of non-CF  
28 bronchiectasis in the US has been estimated at 272 per 100 000 persons over 75 years of age and  
29 hospitalisation rates are increasing (Seitz 2010).

30 Although chronic infection with episodes of exacerbation may drive the progression of bronchiectasis,  
31 the evidence base for antibiotic therapy is limited(Pasteur et al. 2010). An underlying assumption is  
32 often that exacerbations are driven by the overgrowth of a particular microbial species, although mixed  
33 pathogen colonisations are recognised. Antibiotic choice in current practice is initially empirical until  
34 sputum cultures are obtained and then directed by isolated organism (Pasteur et al. 2010).

35 Standard microbial cultures are selective, identifying a restricted range of bacterial species in clinical  
36 samples. Molecular, culture-independent, techniques such as 16S rRNA gene sequencing have been  
37 shown to detect a much greater variety of microbes from the same specimens as standard culture  
38 techniques (Huang et al. 2010; Erb-Downward et al. 2011; Tunney et al. 2011; Cox et al. 2010;  
39 Charlson et al. 2010; Hilty et al. 2010; Rogers et al. 2009).

40 In order to understand the potential impact of culture-independent techniques on the management of  
41 chronic bronchial infection, we have carried out a prospective six-month study of patients with CT-  
42 defined bronchiectasis attending clinics at the Royal Brompton Hospital, London. Recruited patients  
43 were studied at monthly intervals and during any exacerbations.

44 We present here the results of quantification of the bacterial burden by quantitative PCR of the 16S  
45 rRNA gene and community analyses, comparing them to clinical outcomes and microbiological  
46 cultures.

47 Microbial diversity reflects the number of species, their presence and their abundance, in a study.  
48 Higher levels of diversity are associated with resilience of microbial communities to invasion, and may  
49 characterise human health. We have therefore examined associations with the number and  
50 proportions of species in individual patients (captured by measures of  $\alpha$ -diversity), and with the  
51 community structure across patients (reflected in  $\beta$ -diversity statistics).

---

52 Some of this work has been presented before in the form of an abstract and presentation at the  
53 American Thoracic Society International Conference 2015 (Cox et al. 2015)

54

55

---

56 **Methods**

57 Participants

58 We recruited patients with CT (computerised tomography) defined non-CF bronchiectasis and daily  
59 sputum production between December 2010 and May 2011 at the Royal Brompton Hospital, a tertiary  
60 referral centre. Patients gave their full informed consent and the study was approved by South West  
61 London REC under reference number 10/H0801/53. Patients had all previously been screened  
62 according to the British Thoracic Society bronchiectasis guidelines. Patients had monthly research  
63 visits at which fresh sputum samples were collected and spirometry and clinical assessment  
64 performed. Patients were encouraged to attend the centre for a suspected exacerbation and to  
65 provide a further sputum sample. An exacerbation was defined as an acute deterioration with  
66 worsening local symptoms (increased cough, sputum volume, viscosity, purulence, breathlessness)  
67 and/or systemic upset and the physician determined need for antibiotics as per the BTS  
68 bronchiectasis guidelines. The clinical state for each sample was defined as baseline (B),  
69 exacerbation (E), treatment (T), or recovery (R) as previously published (Zhao et al. 2012). Briefly, B  
70 was defined as well or mild increase in respiratory symptoms, no doctor defined respiratory  
71 exacerbation, not hospitalised, not on episodic antibiotics for more than 30 days. E was defined as a  
72 doctor defined respiratory exacerbation, the sample was prior to the start of episodic intravenous (IV)  
73 or oral antibiotics, not on episodic antibiotics for more than 30 days. T was defined as on IV or oral  
74 episodic antibiotics for treatment of doctor defined respiratory exacerbation whilst R was defined as off  
75 episodic antibiotics for less than 30 days and may or may not be back to baseline clinical state.  
76 Patients recorded antibiotic use during the six month period.

77 Sputum samples underwent the standard clinical microbiology and reporting for non-CF sputum  
78 samples (Chocolate agar and Blood agar at 5% CO<sub>2</sub> and 37 °C, MacConkey agar at 37 °C). Samples  
79 for molecular testing were stored frozen at -80 °C prior to DNA extraction which was performed using  
80 the FastDNA Spin Kit for Soil (MP Biomedicals, Santa Ana, CA, USA) as per manufacturer instructions  
81 (including 55 °C incubation at elution). Bead-beating was performed at 6800 rpm for two cycles of 30  
82 seconds (Precellys, Bertin Technologies, Montigny-le-Bretonneux, France).

83 Molecular microbiology

84 Quantitative PCR of each extracted DNA was performed in triplicate using the Vii7 Real Time PCR  
85 system (Life Technologies, Waltham, MA, USA) and the primers 520 F AYT GGG YDT AAA GNG and

---

86 802 R TAC NVG GGT ATC TAA TCC targeting the 16S rRNA gene V4 region. Samples that failed to  
87 amplify were repeated twice to confirm the result. Reaction conditions are available in supplementary  
88 methods.

89 16S rRNA gene amplification of the V3–V5 region was performed in quadruplicate using adapted  
90 primers 357F/926R (Sim et al. 2012) with 12 bp barcodes included in the reverse primer (Fierer et al.  
91 2008) and 454 sequencing adaptors A and B included in the reverse and forward primers respectively.  
92 Sequencing was performed on a Roche 454 (454 Life Sciences, Branford, CT, USA) and further  
93 methodology and sequence processing is detailed in supplementary methods. The resulting OTU  
94 table of 381 samples and 352 OTUs was used for all subsequent analyses and imported to the R  
95 statistical environment as a PhyloSeq (McMurdie & Holmes 2013) object, along with a mid-point  
96 rooted FastTree phylogenetic tree. A cross-sectional dataset of 72 samples and 194 OTUs was  
97 produced by sub-sampling the first baseline classified (B in the BETR scheme) sample available from  
98 each patient in PhyloSeq.

99 For comparisons with microbial culture, OTUs were selected by either being the most abundant OTU  
100 with similar identification (*Pseudomonas*, *Moraxella*, *Streptococcus*), the only OTU identified as that  
101 genus (*Stenotrophomonas*, *Proteus*) or the representative read positively identified by phylogenetic  
102 analyses as the same species (*Haemophilus influenzae*).

### 103 Statistics

104 Statistical analysis was performed in the R statistical environment (version 3.1.2, (Team 2014)).

105 Species richness, Pielou's evenness, Shannon's Diversity Index, and Inverse Simpson's Index were  
106 calculated for each sample. Diversity metrics were assessed for normality using Shapiro-Wilk's tests  
107 and quantile-quantile plots. Shannon's Diversity Index, Inverse Simpson's Index and Pielou's  
108 evenness were tested against variables using Wilcoxon Signed Rank and Kruskal Wallis Rank Sum  
109 tests. Species richness was normally distributed and tested using Student's T-test and ANOVA.  
110 Spearman's Rank correlations were used for continuous data. Bacterial load as determined by qPCR  
111 was normally distributed and paired Student's T-test used. The first available consecutive samples of  
112 each combination of BETR class were used from each patient in this analysis i.e. B-B, B-E, B-T and B-  
113 R. If there was no available B sample in the month prior to another class, this pair was dropped.

---

114 For the Adonis (PERMANOVA) analyses, all variables were tested independently in the cross-  
115 sectional dataset. Those that proved to be significant were taken forward for further testing together in  
116 a larger model. Non-significant variables were backward removed from the models and samples with  
117 missing data were removed list wise. The order of the variables remaining was also tested as this can  
118 influence a PERMANOVA and the final model explains the maximum variance possible in the most  
119 limited number of variables. The final variables included in order were: isolation of mucoid  
120 *Pseudomonas aeruginosa*, isolation of *Haemophilus influenzae*, prophylactic treatment with Colistin  
121 and isolation of *Staphylococcus aureus* and the detailed model and R<sup>2</sup> values can be found in the  
122 supplementary methods.

123 Sequence data has been submitted to the European Nucleotide Archive and is available under  
124 accession number XXX.

125 **Role of the funding sources:**

126 The funders played no role in study design; in collection, analysis and interpretation of data; in the  
127 writing of the manuscript; or in the decision to submit the manuscript.

128

---

129 **Results**

130 Patient characteristics

131 Eighty-five subjects were recruited and produced 467 sputum samples. Post DNA and sequencing  
132 quality controls, 381 samples from 76 subjects were included in the longitudinal analysis. A cross-  
133 sectional dataset was created by taking the first baseline sample of 72 subjects. The remaining four  
134 subjects had only exacerbation, treatment or recovery samples. The aetiology of the bronchiectasis  
135 was most commonly idiopathic (47 %) or post-infective (25 %) (Table 1 and Figure 1). In general, the  
136 disease was severe (median baseline FEV1 % predicted 63 %, IQR 54 % to 82 %).

137 Baseline microbiome

138 DNA was successfully extracted, PCR amplified and amplicons sequenced for 411 samples, yielding a  
139 total of 956,269 high-quality reads after quality control (see Figure E1 in the online data supplement).  
140 We chose a randomly re-sampled threshold of 451 reads to ensure no bias between sample  
141 comparisons. The number of reads used discriminates very well between samples and individuals and  
142 rarefaction curves reach an asymptote indicating sufficient sampling (supplementary methods).

143 For the cross-sectional baseline data set, phylogenetic analyses showed the presence of 352  
144 operational taxonomic units (OTUs), 150 of which were present in more than one subject with 21  
145 being present at an overall abundance > 0.5%. *Haemophilus\_542* was the most abundant OTU  
146 overall, followed by *Pseudomonas\_aeruginosa\_915* and *Streptococcus\_338* (Figure 1B). Using  
147 phylogenetic analysis we were able to confirm the *Haemophilus\_542* OTU to represent *H. influenzae*  
148 (see Figure E2 in the online data supplement). This approach was also attempted for  
149 *Streptococcus\_338*, but the resulting phylogenetic trees were unable to discriminate Streptococcal  
150 OTUs at the species level (data not shown).

151 The most common organisms detected in sputum by clinical culture, for subjects for whom we also  
152 had 16S rRNA gene sequence data, were *Pseudomonas aeruginosa* (45.3% of subjects),  
153 *Staphylococcus aureus* (21.3 %) and *Haemophilus influenzae* (14.7%).

154 We compared 16S rRNA gene sequences with microbial culture by classifying OTUs as either present  
155 or absent in a subject. Comparison with DNA sequences and culture, with sequence as the putative  
156 gold standard, suggested that the calculated accuracy of cultures for *P. aeruginosa* was 71% and for  
157 *H. influenzae* was 62%, although the sensitivities were only 52% and 18%, with disagreement



158 commonly observed in culture negative, 16S rRNA gene positive samples (Table 2). The apparent  
159 false discovery rate relative to 16S rRNA gene sequencing for culturing *P. aeruginosa* was 11%, and  
160 for *S. aureus* was 64%. There was poor accuracy (9%) and sensitivity (4%) for Streptococcal OTUs  
161 compared with culture.

162 Alpha-diversity by all measures (Shannon Diversity Index, Inverse Simpsons Index, species richness  
163 and evenness) was significantly lower if the subject was receiving prophylactic antibiotics, or if any  
164 organism had been isolated from the sample, or if mucoid *P. aeruginosa* had been isolated (Figure  
165 2A). The patients' gender, treatment with steroids, age, FEV1, FVC, BMI, and the years since first *P.*  
166 *aeruginosa* isolate were not associated with diversity.

167  $\beta$ -diversity

168 Bray-Curtis dissimilarity was calculated in order to compare the relationship between communities of  
169 baseline samples from each individual and clinical factors We constructed permutational multi-variate  
170 ANOVA (Adonis) models of the baseline cross-sectional dataset to test the effect of individual  
171 variables on between-sample  $\beta$ -diversity. Variables were removed from the model if they were no  
172 longer significant, optimising the fewest number of variables that together explained the highest  
173 proportion of variance. The variance of diversity was significantly related to treatment with prophylactic  
174 Colistin ( $R^2$  0.04,  $P = 0.008$ ) and by isolation of mucoid *P. aeruginosa* ( $R^2$  0.14,  $P < 0.001$ ), *H.*  
175 *influenzae* ( $R^2$  0.07,  $P < 0.001$ ) and *S. aureus* ( $R^2$  0.04,  $P = 0.013$ ). These variables together  
176 accounted for 29% of the total variance in the community structure.

177 Longitudinal analysis

178 There were 122 infective exacerbations recorded by the 64 patients that completed follow up over the  
179 6 month period. Forty one patients had two or more exacerbations over 6 months, with 14 patients  
180 having no exacerbations and 9 patients having only one.

181 There was no significant difference in the exacerbation rate in patients on prophylactic antibiotics or  
182 patients with or without *P. aeruginosa*. In total, 37 exacerbations coincided with clinic visit. 18 (50%) of  
183 these were not accompanied by the growth of bacteria in culture, despite non-usage of antibiotics  
184 during the previous 30 days. Only 4/37 (11%) of the exacerbation samples were associated with  
185 isolation of a bacterium not seen in prior samples.

---

186 We used 16S rRNA gene quantitative PCR to measure the total bacterial load in the samples. The  
187 median copy number was  $2.2 \times 10^8$  per ml of sputum at baseline (IQR  $4.8 \times 10^7 - 8.6 \times 10^8$ ). We found  
188 no significant difference in bacterial load between the baseline, exacerbation, treatment or recovery  
189 samples (see Figure E3 in the online data supplement).

190 There was no significant difference in any diversity measure between exacerbation samples and  
191 paired baseline ( $n = 13$ ), treatment ( $n = 5$ ) or recovery samples ( $n = 21$ ) from the month immediately  
192 prior to the exacerbation (see Figure E4 in the online data supplement). There was also no difference  
193 in any diversity measure between exacerbation samples and those immediately following recovery.

194 A multivariate ANOVA showed that 5.9-6% of the total variation in longitudinal  $\beta$ -diversity could be  
195 explained by the subject the sample was from, compared to 5-8% for the underlying disease (Figure  
196 2B).

197 We calculated a per subject median Bray Curtis dissimilarity for those with 3 or more samples to give  
198 an individual range of diversity in different samples from individual subjects. A high value indicated  
199 that the microbial communities changed from month to month in relative abundance and membership,  
200 and a low value indicated that samples from the same subject were similar. The median dissimilarity  
201 was selected in order to reduce sensitivity to outlying data points and all possible pairs of  
202 dissimilarities were included. We observed a wide range of stability for the normally distributed metric  
203 (range 0.12 to 0.98; mean = 0.58, median = 0.60) (Figure 2C).

204 The stability metric did not correlate significantly with clinical characteristics including BMI,  
205 prophylactic antibiotic treatment, number of exacerbations, average lung function (FEV1pp, FVCpp),  
206 underlying cause, and carriage of *P. aeruginosa*. Additionally there was no difference in this metric  
207 between patients who did or did not change clinically during the study.

208 Given the high individuality of the microbial communities, we produced per subject plots of the OTU  
209 relative abundances alongside the clinical data and quantitative PCR of the 16S rRNA gene as a  
210 proxy for bacterial load. A wide spectrum of community compositions, stability, and pathogen load  
211 were observed, (Figures 3A to 3D for examples and Figure E5 in the online data supplement for all  
212 other subjects).

---

213 **Discussion**

214 The study shows substantial complexity in the airway microbiome in patients with chronic bronchial  
215 infection, with frequent mixed infections and potentially important discrepancies between DNA  
216 sequencing results and classical clinical culture. The structure of microbial communities within patients  
217 was highly individual, relating only weakly to underlying disease, and often stable over the six months  
218 of the study despite the use of antibiotics and changes in clinical state.

219 The differences between culture and 16S rRNA gene sequencing show that the common complexity of  
220 pathogen growth is captured incompletely by standard microbial culture. In particular, the presence of  
221 *H. influenzae* appears under-recognised by culture, and *Pseudomonas* spp. and *S. aureus* were at  
222 times present in culture and not detected by sequencing. This may reflect the capacity of culture to  
223 isolate pathogens when they are present in very low numbers, and the ability of *Pseudomonas* spp.  
224 and *S. aureus* to outgrow other organisms in culture. Since the discrepancy in *S. aureus* was most  
225 marked, primer sequences were checked for specificity for this group of organisms and found to have  
226 100% identity to the *S. aureus* target. Inefficient DNA extraction can be of concern with Gram positive  
227 organisms, although the bead-beating approach has been employed widely and in our hands  
228 efficiently lyses Mycobacteria and fungi. It has also been validated for endospore extraction, so we do  
229 not believe that inefficient DNA extraction has occurred here. It is possible however that relatively  
230 inefficient amplification of 16S rRNA gene sequences from genomic DNA of *S. aureus* against a mixed  
231 template background may have occurred.

232 A limitation of 16S rRNA sequencing is that particular OTUs may not define bacterial species, best  
233 exemplified by the inability to identify *Streptococcus pneumoniae* or *S. mitis* among the streptococcal  
234 OTUs. It is likely that the discrepancy between culture and the 16S rRNA gene sequencing is caused  
235 by the summing of multiple different Streptococcal species, including common respiratory  
236 commensals, into a single OTU. OTU analysis also cannot be used to define pathogenicity, and does  
237 not give information about antibiotic susceptibility.

238 The microbiome in our patients may reflect their advanced disease and treatment with multiple  
239 courses of antibiotics over many years. Although the literature does not yet provide a clear meta-  
240 analysis of the normal airway microbiome, the distribution and diversity of OTUs in these patients  
241 seems to differ markedly from that seen in normal subjects or those with asthma or COPD, where

---

242 Gram negative anaerobes such as *Prevotella* or *Veilonella* spp. may make up to ~30% of OTU  
243 abundance (Hilty et al. 2010; Molyneaux et al. 2013; Erb-Downward et al. 2011).

244 It is unclear whether the lower abundance of these organisms in our patients is a result of the  
245 presence of more abundant organisms, competition with other organisms such as *P. aeruginosa* and  
246 *H. influenzae*, or whether it follows selection by treatment with antibiotics. It is possible that depletion  
247 of the commensal community may itself facilitate early pathogen introduction to community and  
248 dominance. In chronic obstructive pulmonary disease, acquisition of a new bacterial strain has been  
249 associated with exacerbations (Sethi et al. 2002). Here we lack strain level resolution, although new  
250 OTUs could only rarely be seen associating temporally with exacerbations. For example, Subject 15  
251 *Pseudomonas\_aeruginosa\_915* takes over from *Streptococcus\_338* at exacerbation, in subject 24  
252 *Stenotrophomonas\_401* from *Pseudomonas\_aeruginosa\_915* whilst there is an increase in  
253 *Staphylococcus\_300* in patient 67.

254 Our observation that prophylactic antibiotics correlated with reduced alpha-diversity supports a  
255 community level impact of prophylactic therapy. There was however no correlation of alpha or beta  
256 diversity or bacterial load with important clinical parameters such as severity or duration of disease,  
257 suggesting that analyses of diversity are not simply a reflection of disease severity and that they  
258 should be used alongside the recognition and enumeration of pathogens.

259 The culture of mucoid *P. aeruginosa* was associated with changes in community structure, which  
260 might be due to the impact on the local environment in the lung of this phenotype or could be a marker  
261 of longer colonisation as mucoidy is associated with chronic colonisation (Levy et al. 2008).

262 Our finding that the bacterial community relates poorly to clinical state supports the results of  
263 longitudinal studies of patients with Cystic Fibrosis (Zhao et al. 2012; Stressmann et al. 2011; Tunney  
264 et al. 2013; Carmody et al. 2013; Carmody et al. 2015). Overall in these studies no, or poor  
265 associations with clinical state are seen when taking each cohort as a whole. However, as we have  
266 also demonstrated here, in subsets of patients associations can be seen. CF is a much more clinically  
267 defined disease than non-CF bronchiectasis, though strong individuality in the microbiota may also  
268 mask the influence of the microbiota on clinical state.

269 The present study included a number of different underlying etiologies of non-CF bronchiectasis in  
270 order to allow comparison of these and to assess whether the microbial communities supported these

---

271 clinical classifications. After taking into account the strong per subject differences in microbial  
272 communities, a small proportion of the variance could be ascribed to etiology. This might indicate that  
273 in larger studies stratification by etiology would reduce the variance and increase power to detect  
274 disease-specific effects.

275 Here we find that *Haemophilus influenzae* and *Pseudomonas aeruginosa* are the two most common  
276 and dominant pathogens by 16S rRNA gene sequencing. In our PERMANOVA model isolation of  
277 mucoid *Pseudomonas aeruginosa* or *Haemophilus influenzae* had the greatest influence on  
278 community structure as a whole. Changes in the microbiota composition have also been demonstrated  
279 after prophylactic treatment with erythromycin in a more homogenous and milder group of  
280 bronchiectasis patients, though only when considering individuals dominated by *Haemophilus*  
281 *influenzae* (Rogers et al. 2014). This suggests that although underlying etiology can be important, the  
282 dominant organism present, irrespective of etiology, has greater influence and could be targeted  
283 accordingly.

284 Discerning the impact of individual antibiotics was difficult in this dataset, given the extremely  
285 individual microbiota and the range of different antibiotics used for prophylaxis, exacerbation, and non-  
286 respiratory reasons. Colistin was the only antibiotic that had a significant impact on community  
287 structure. It was the only nebulised antibiotic to be used frequently within the cohort, so the impact of  
288 nebulisation, where a higher concentration of antibiotic is expected local to the respiratory tract, is  
289 difficult to separate from the actions of Colistin itself. The influence of Colistin on community structure  
290 is not independent of the influence of mucoid *P. aeruginosa* as this antibiotic would be used to target  
291 the organism (Haworth et al. 2014).

292 We separated antibiotics into those given prophylactically for respiratory reasons, respiratory  
293 exacerbation antibiotics and non-respiratory antibiotics. Only a small number of non-respiratory  
294 antibiotics were prescribed to study patients and as these are at a lower dose and likely to have less  
295 influence on the microbial communities in the airways, these were not included in the BETR definition.

296 Possible explanations for the poor correlation between the sputum microbiome and clinical course  
297 include that the disease is driven by mucosal events that are poorly reflected in sputum, or that the  
298 activity of the microbiome is changing independently of bacterial load (for example through expression  
299 of virulence factors), or that exacerbations are being driven by virus or fungal infections rather than

---

300 bacteria. Our study was not designed to examine exacerbation specifically, as its aim was to observe  
301 changes of the microbial community in a diverse non-CF bronchiectasis cohort over time.  
302 Consequently, only a relatively small number of exacerbation (E) or treatment (T, exacerbation with  
303 current antibiotic treatment) samples were obtained.

304 We were unable to obtain a full set of samples analysed by all methodologies from every individual. As  
305 can be seen in the consort diagram (Supplementary Figure E1) this was due to subjects withdrawing  
306 part way through the study, subjects being unable to expectorate sputum on a particular occasion and  
307 insufficient material for analysis at the further methodological stages of 16S rRNA gene sequencing.  
308 Lack of sputum expectoration was also an issue with T (treatment) samples as treatment reduced  
309 sputum volume. As 16S rRNA gene qPCR was applied later than 16S analyses it was only performed  
310 for subjects with sufficient sample remaining.

311 Sputum samples in some individuals revealed the same community every month for six months,  
312 showing consistency of community structure. The variability in other patients might result from a  
313 respiratory tract rendered inhomogeneous by advanced disease, which may confound a whole airway  
314 sample such as sputum (Jorth et al. 2015; Erb-Downward et al. 2011). More frequent sampling could  
315 establish whether changes in the microbiota not coincident with clinical change were due to sampling  
316 variability, community variability as a result of drivers with no clinical impact (e.g. competition between  
317 microorganisms) or clinical changes that occurred between visits and were not captured. Longer and  
318 more frequent sampling may also allow the development and application of more sensitive statistical  
319 and ecological methods that will also be of benefit. It is important nevertheless that the number of  
320 patients and the period of time studied here is substantial compared to previous studies of BX and  
321 other chronic suppurative lung diseases.

322 It is possible that serial sampling of the sputum microbiome with nucleic acid sequencing may be used  
323 to better therapeutic outcomes for patients with chronic bronchial infection. Given the extremely high  
324 individuality, longitudinal assessments of the individual patient's microbiota during periods of health  
325 may become the best control for managing their exacerbations.

326 Diverse bacterial communities can be resistant to pathogen invasion, so prophylaxis with more  
327 targeted antibiotics that maintain diversity might be beneficial. Our results suggest that accurate  
328 profiling of the respiratory microbiome will lead to improvements in the understanding of the role of

---

329 prophylactic antibiotics on community diversity, accurate recognition of pathogens and their  
330 interactions in complex communities, and better identification and treatment of true infective  
331 exacerbations.

332 Conducting even larger studies that will allow stratification of patients by underlying etiology, dominant  
333 pathogen and antibiotic treatment will increase power significantly and may lead to identification of  
334 stronger links between clinical state and the microbiota present. A number of inhaled antibiotics are in  
335 development for bronchiectasis and a better understanding of their benefits and the consequences of  
336 their use on the microbial community is needed.

### 337 **Acknowledgements**

338 We are grateful to the patients and staff of the Royal Brompton and Harefield NHS Foundation Trust  
339 for their assistance.

### 340 **Author contributions**

341 MJC, ML, WOCC and MFM planned the study, based on a clinical design by ML. CH, and ML  
342 recruited patients, sampled and gathered clinical data. MJC, GKM and ET performed 16S rRNA gene  
343 laboratory studies. MJC led statistical analyses of the data with contributions from WOCC, PLJ, AJ  
344 and MC. MJC and ML wrote the first draft of the paper. All authors contributed to the interpretation of  
345 the results and the writing of the paper.

### 346 *Funding*

347 The study was funded by the Wellcome Trust under WT077959 and WT096964. This project was  
348 funded and supported by the NIHR Respiratory Disease Biomedical Research Unit at the Royal  
349 Brompton and Harefield NHS Foundation Trust and Imperial College London. The views expressed in  
350 this publication are those of the authors and not necessarily those of the NHS, The National Institute  
351 for Health Research or the Department of Health. Funding for sequencing was provided by a grant to  
352 DB from Novartis UK. WOCC and MFM are supported by a Wellcome Trust Joint Senior Investigator's  
353 Award, which also supports MJC and EMT and WOCC is an NIHR Senior Investigator.

### 354 **References**

355 Carmody, L.A. et al., 2013. Changes in Cystic Fibrosis Airway Microbiota at Pulmonary Exacerbation.  
356 *Annals of the American Thoracic Society*, 10(3), pp.179–187.



- 
- 357 Carmody, L.A. et al., 2015. The daily dynamics of cystic fibrosis airway microbiota during clinical  
358 stability and at exacerbation. *Microbiome*, 3(1), p.5176.
- 359 Charlson, E.S. et al., 2010. Disordered Microbial Communities in the Upper Respiratory Tract of  
360 Cigarette Smokers. *PLoS ONE*, 5(12), p.e15216.
- 361 Cox, M.J. et al., 2010. Airway Microbiota and Pathogen Abundance in Age-Stratified Cystic Fibrosis  
362 Patients. *PLoS ONE*, 5(6), p.e11044.
- 363 Cox, M.J. et al., 2015. Longitudinal Analysis of the Non-Cystic Fibrosis Bronchiectasis Microbiome  
364 (ATS Journals). In American Thoracic Society International Conference Meetings Abstracts.
- 365 Erb-Downward, J.R. et al., 2011. Analysis of the Lung Microbiome in the “Healthy” Smoker and in  
366 COPD. *PLoS ONE*, 6(2), p.e16384.
- 367 Fierer, N. et al., 2008. The influence of sex, handedness, and washing on the diversity of hand surface  
368 bacteria. *Proceedings of the National Academy of Sciences*, 105(46), pp.17994–17999.
- 369 Haworth, C.S. et al., 2014. Inhaled colistin in patients with bronchiectasis and chronic *Pseudomonas*  
370 *aeruginosa* infection. *American Journal of Respiratory and Critical Care Medicine*, 189(8),  
371 pp.975–982.
- 372 Hilty, M. et al., 2010. Disordered microbial communities in asthmatic airways. *PLoS ONE*, 5(1),  
373 p.e8578.
- 374 Huang, Y.J. et al., 2010. A persistent and diverse airway microbiota present during chronic obstructive  
375 pulmonary disease exacerbations. *Omics : a journal of integrative biology*, 14(1), pp.9–59.
- 376 Jorth, P. et al., 2015. Regional Isolation Drives Bacterial Diversification within Cystic Fibrosis Lungs.  
377 *Cell Host and Microbe*, pp.1–52.
- 378 Levy, H. et al., 2008. Predictors of mucoid *Pseudomonas* colonization in cystic fibrosis patients.  
379 *Pediatric Pulmonology*, 43(5), pp.463–471.
- 380 McMurdie, P.J. & Holmes, S., 2013. phyloseq: An R Package for Reproducible Interactive Analysis  
381 and Graphics of Microbiome Census Data M. Watson, ed. *PLoS ONE*, 8(4), p.e61217.
- 382 Molyneaux, P.L. et al., 2013. Outgrowth of the Bacterial Airway Microbiome following Rhinovirus  
383 Exacerbation of Chronic Obstructive Pulmonary Disease. *American Journal of Respiratory and*  
384 *Critical Care Medicine*, p.130830082012006.
- 385 Pasteur, M.C. et al., 2010. British Thoracic Society guideline for non-CF bronchiectasis. *Thorax*,  
386 65(Suppl 1), pp.i1–i58.
- 387 Rogers, G.B. et al., 2009. Studying bacteria in respiratory specimens by using conventional and  
388 molecular microbiological approaches. *BMC Pulmonary Medicine*, 9(1), p.14.
- 389 Rogers, G.B. et al., 2014. The effect of long-term macrolide treatment on respiratory microbiota  
390 composition in non-cystic fibrosis bronchiectasis: an analysis from the randomised, double-blind,  
391 placebo-controlled BLESS trial. *The Lancet. Respiratory medicine*, 2(12), pp.988–996.
- 392 Seitz, A.E., 2010. Trends and Burden of Bronchiectasis-Associated Hospitalizations in the United  
393 States, 1993-2006. *Chest*, 138(4), p.944.
- 394 Sethi, S. et al., 2002. New strains of bacteria and exacerbations of chronic obstructive pulmonary  
395 disease. *The New England journal of medicine*, 347(7), pp.465–471.
- 396 Sim, K. et al., 2012. Improved Detection of Bifidobacteria with Optimised 16S rRNA-Gene Based  
397 Pyrosequencing N. Ahmed, ed. *PLoS ONE*, 7(3), p.e32543.



- 
- 398 Stressmann, F.A. et al., 2011. Does bacterial density in cystic fibrosis sputum increase prior to  
399 pulmonary exacerbation? *Journal of cystic fibrosis : official journal of the European Cystic Fibrosis*  
400 *Society*, 10(5), pp.357–365.
- 401 Team, R.C., 2014. R: A language and environment for statistical computing. *R-project.org*. Available  
402 at: <http://www.R-project.org/> [Accessed June 10, 2015].
- 403 Tunney, M.M. et al., 2013. Lung microbiota and bacterial abundance in patients with bronchiectasis  
404 when clinically stable and during exacerbation. *American Journal of Respiratory and Critical Care*  
405 *Medicine*, 187(10), pp.1118–1126.
- 406 Tunney, M.M. et al., 2011. Use of culture and molecular analysis to determine the effect of antibiotic  
407 treatment on microbial community diversity and abundance during exacerbation in patients with  
408 cystic fibrosis. *Thorax*, 66(7), pp.579–584.
- 409 Zhao, J. et al., 2012. Decade-long bacterial community dynamics in cystic fibrosis airways.  
410 *Proceedings of the National Academy of Sciences*.
- 411
- 412

---

413 **Table 1 – Patient Demographics**

---

**Table 2 – Comparison of rRNA gene sequences and microbial culture**

---

## Figure Legends

### Figure 1

**1A.** Demographics of the non-CF bronchiectasis cohort indicating distribution of (from left to right, top to bottom): the cause of bronchiectasis; FVC percent predicted (red line indicates 50%); subject age; subject sex; BMI class; FEV1 percent predicted (red line indicates 50%); smoking status; and whether subject has previously cultured *P. aeruginosa*.

**1B.** Distribution of OTUs within the cohort. Abundance is the total number of reads assigned to an OTU from any sample. Prevalence is how often an OTU is detected in samples. *Haemophilus\_542* was most abundant, contributing 16% of all reads in the dataset. *Streptococcus\_338* was most prevalent and was found to some degree in every sample.

### Figure 2

**2A.** Boxplots of species richness for cross-sectional baseline samples comparing clinical categories. Notches indicate 95% confidence interval. P values were calculated using Welch's T test.

**2B.** Non-metric multi-dimensional scaling plot of Bray-Curtis dissimilarity. This ordination plot visually represents the Adonis results. The plot has been split by underlying cause of non-CF bronchiectasis to reduce over-plotting and to enable clearer visualisation of clustering of points, although each panel can be considered to be directly overlaid upon one another. Each point represents a sample and the larger the distance between points the larger the difference in community structure of those samples. Samples from the same patient have the same colour. Samples from the same patient tend to cluster together, illustrating the high individuality. There is some separation of points evident in the underlying diseases, e.g. Post-infectious samples tend to be present in the bottom right of the plot, PCD top right, ABPA central bottom and idiopathic more widely distributed.

**2C.** Histogram of the median per patient Bray Curtis dissimilarity. Bray Curtis dissimilarity was calculated for each patient with more than 3 samples and ranged from 0.12 to 0.98. The embedded stacked bar plots illustrate the patients at the two extremes, least diverse and most stable to most diverse and variable.

---

### Figure 3

Selected subject plots. Each subject is represented by four plots, from top to bottom: clinical variables including antibiotic treatment, growth of microorganisms on clinical culture and B,E,T,R category; Lung function as FEV1 % predicted (red), FVC % predicted (green) with 30% and 80% represented by the grey dotted line; bacterial load as measured by 16S rRNA gene qPCR in copies per ml of sputum with the detection limit of the assay indicated by the grey dotted line; stacked barplots of the OTUs present in each sample. Colour coding for top 26 OTUs consistent between plots, with greyscale used for the remaining OTUs. Rare OTUs in each plot are summed as “Other”.

**3A** Subject 12: 68 yr old male with ABPA, normal BMI and 2 exacerbations during the study period. The patient had the highest median Bray-Curtis dissimilarity. *Streptococcus\_693* was the most abundant OTU in every sample (although not dominant) but other OTUs changed in relative abundance from sample to sample. Bacterial load changed substantially over the sampling period.

**3B** Subject 75: 64 yr old female, post-infectious, underweight and 2 exacerbations during the study period. The patient had the lowest median Bray-Curtis dissimilarity and most stable microbial community, dominated by *Haemophilus\_542*, despite two clinical exacerbations and treatment with Augmentin. Bacterial load varied by two orders of magnitude from  $10^7$  to  $10^9$  copies per ml of sputum.

**3C** Subject 24: 60 yr old male, unknown BX cause, normal BMI and 2 exacerbations during the study period. The patient did show changes in bacterial community that coincided with clinical states, such as an exacerbation at time point Be associated with a large increase in abundance of *Stenotrophomonas\_401*. Antibiotic treatment resolved the exacerbation and *Stenotrophomonas\_401* proportions returned to lower levels.

**3D** Subject 16: 65 yr old male with ABPA, normal BMI and 2 exacerbations during the study period. The patient had an exacerbation at samples D and E, with *Pseudomonas\_aeruginosa\_915* initially dominant being replaced by *Haemophilus\_542*. The proportion of *Haemophilus\_542* and bacterial load in the samples increased, suggesting

---

active growth of Haemophilus\_542 that was supported by coincident clinical culture of *H. influenzae*.

|                                       | Baseline Cross-Sectional                              | Longitudinal |
|---------------------------------------|-------------------------------------------------------|--------------|
| Number of Subjects                    | 72                                                    | 76           |
| Number of Samples                     | 72                                                    | 381          |
|                                       |                                                       |              |
| Sex n (%) Female                      | 49 (68)                                               |              |
| Median Age (Inter Quartile Range)     | 62 (55-68)                                            |              |
| Median BMI (IQR)                      | 19.4 (16.9-22.25)                                     |              |
|                                       |                                                       |              |
| Smoking Status n (%)                  |                                                       |              |
|                                       | <i>Current</i>                                        | 0 (0)        |
|                                       | <i>Ex</i>                                             | 17 (24)      |
|                                       | <i>Never</i>                                          | 47 (65)      |
|                                       | <i>Unknown</i>                                        | 8 (11)       |
|                                       |                                                       |              |
| Cause of bronchiectasis n (%)         |                                                       |              |
|                                       | <i>Idiopathic</i>                                     | 34 (47)      |
|                                       | <i>Post-Infection</i>                                 | 18 (25)      |
|                                       | <i>Allergic Bronchopulmonary Aspergillosis (ABPA)</i> | 8 (11)       |
|                                       | <i>Primary Ciliary Dyskinesia (PCD)</i>               | 7 (10)       |
|                                       | <i>Immunodeficiency</i>                               | 2 (3)        |
|                                       | <i>Other</i>                                          | 3 (4)        |
|                                       |                                                       |              |
| Lung Function                         |                                                       |              |
|                                       | <i>Median percent predicted FEV1 (IQR)</i>            | 63 (54-82)   |
|                                       | <i>Median percent predicted FVC (IQR)</i>             | 79 (69-84)   |
|                                       |                                                       |              |
| Clinical status (BETR Category) n (%) |                                                       |              |
|                                       | <i>Baseline (B)</i>                                   | 72 (100)     |
|                                       | <i>Exacerbation (E)</i>                               | 36 (9)       |
|                                       | <i>Treatment (T)</i>                                  | 17 (4)       |
|                                       | <i>Recovery (R)</i>                                   | 67 (18)      |

| Culture ID                          | OTU ID               | Both +ve  | Both -ve  | Culture - /OTU + | Culture + /OTU - | Accuracy | False Discovery Rate | Sensitivity |
|-------------------------------------|----------------------|-----------|-----------|------------------|------------------|----------|----------------------|-------------|
| <i>Pseudomonas aeruginosa</i>       | Pseudomonas_915      | 106 (28%) | 164 (43%) | 97 (26%)         | 13 (3%)          | 71%      | 11%                  | 52%         |
| <i>Haemophilus influenzae</i>       | Haemophilus_542      | 31 (8%)   | 203 (53%) | 146 (38%)        | 0 (0%)           | 62%      | 0%                   | 18%         |
| <i>Moraxella catarrhalis</i>        | Moraxella_945        | 16 (4%)   | 313 (82%) | 51 (13%)         | 0 (0%)           | 87%      | 0%                   | 24%         |
| <i>Staphylococcus aureus</i>        | Staphylococcus_300   | 20 (5%)   | 313 (78%) | 32 (8%)          | 35 (8%)          | 83%      | 64%                  | 38%         |
| <i>Stenotrophomonas maltophilia</i> | Stenotrophomonas_401 | 11 (3%)   | 323 (85%) | 46 (12%)         | 0 (0%)           | 88%      | 0%                   | 19%         |
| <i>Proteus vulgaris</i>             | Proteus_1088         | 1 ( 0.3%) | 370 (97%) | 8 (2%)           | 1 ( 0.3%)        | 98%      | 50%                  | 11%         |
| <i>Streptococcus pneumoniae</i>     | Streptococcus_338    | 13 (3%)   | 23 (6%)   | 343 (90%)        | 1 ( 0.3%)        | 9%       | 7%                   | 4%          |



A

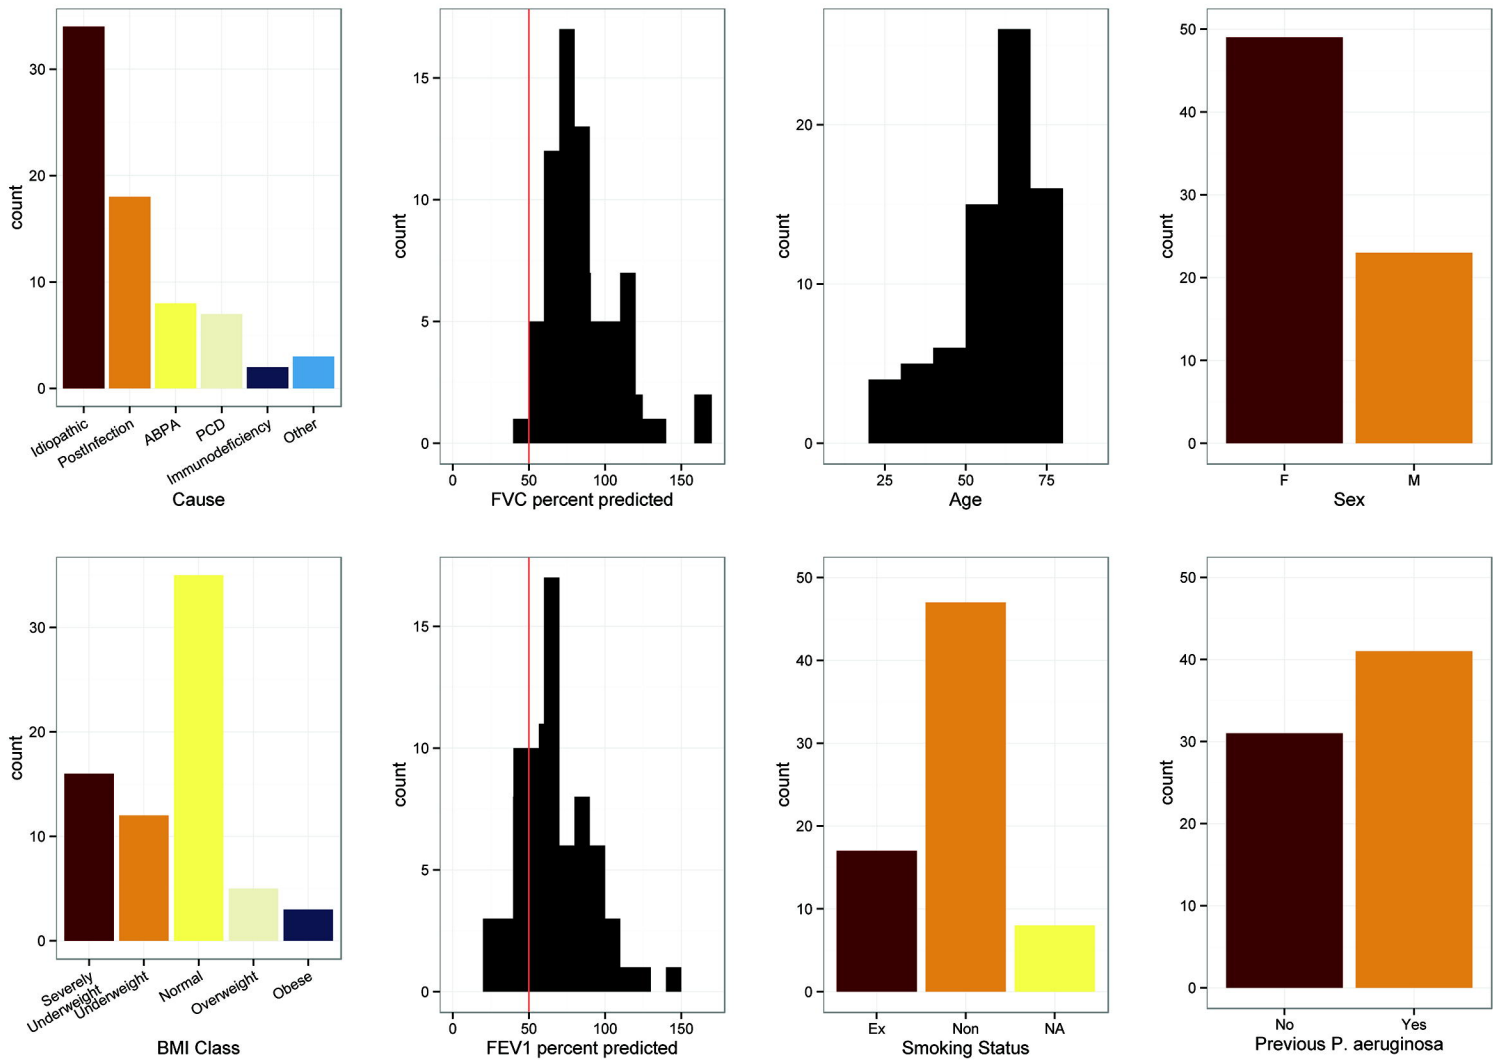

B

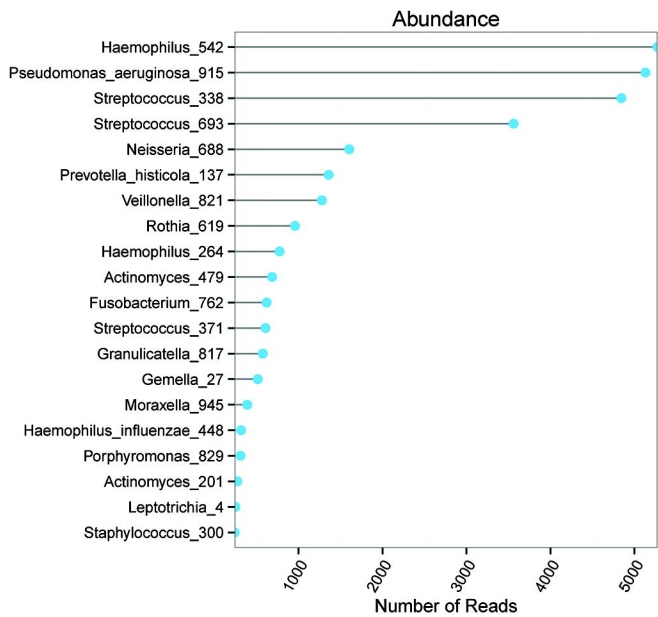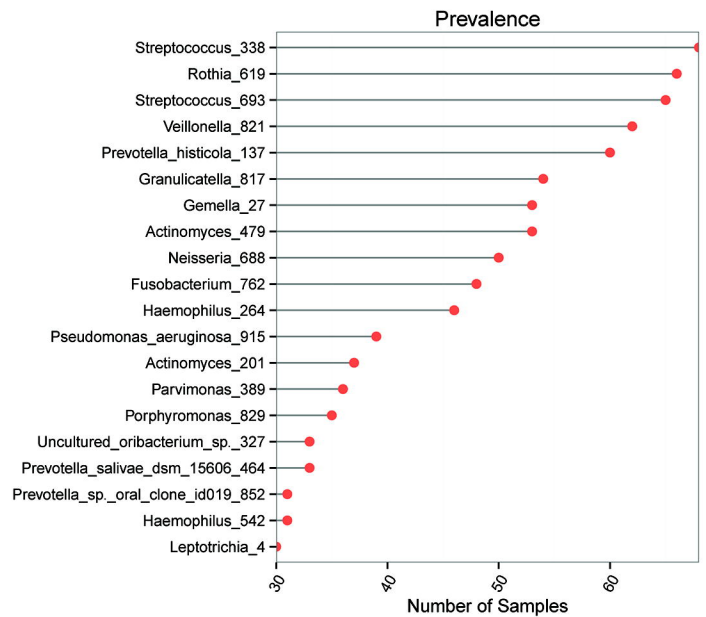

A

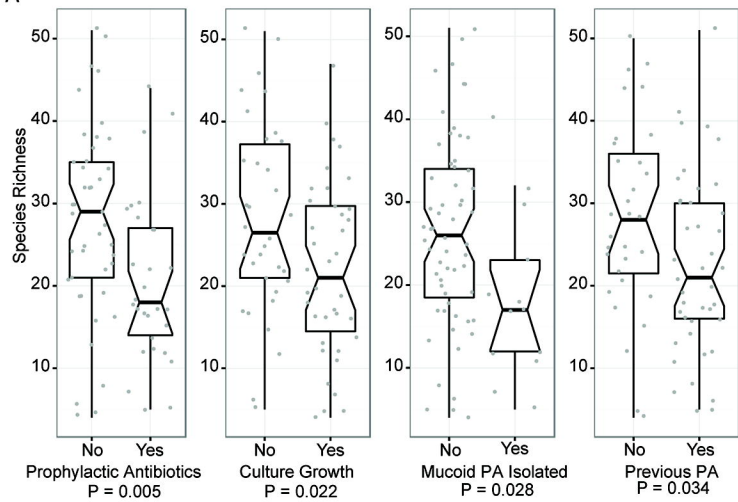

C

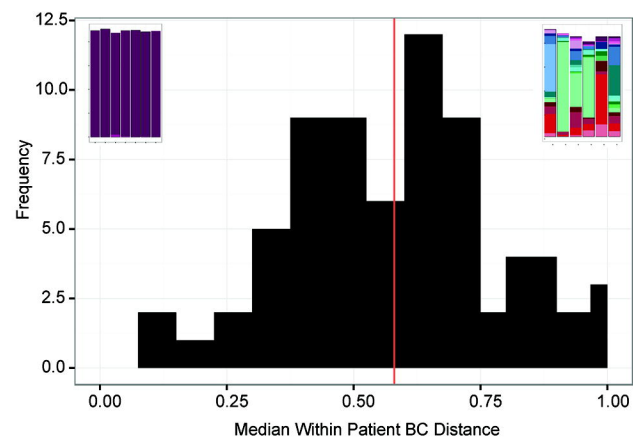

B

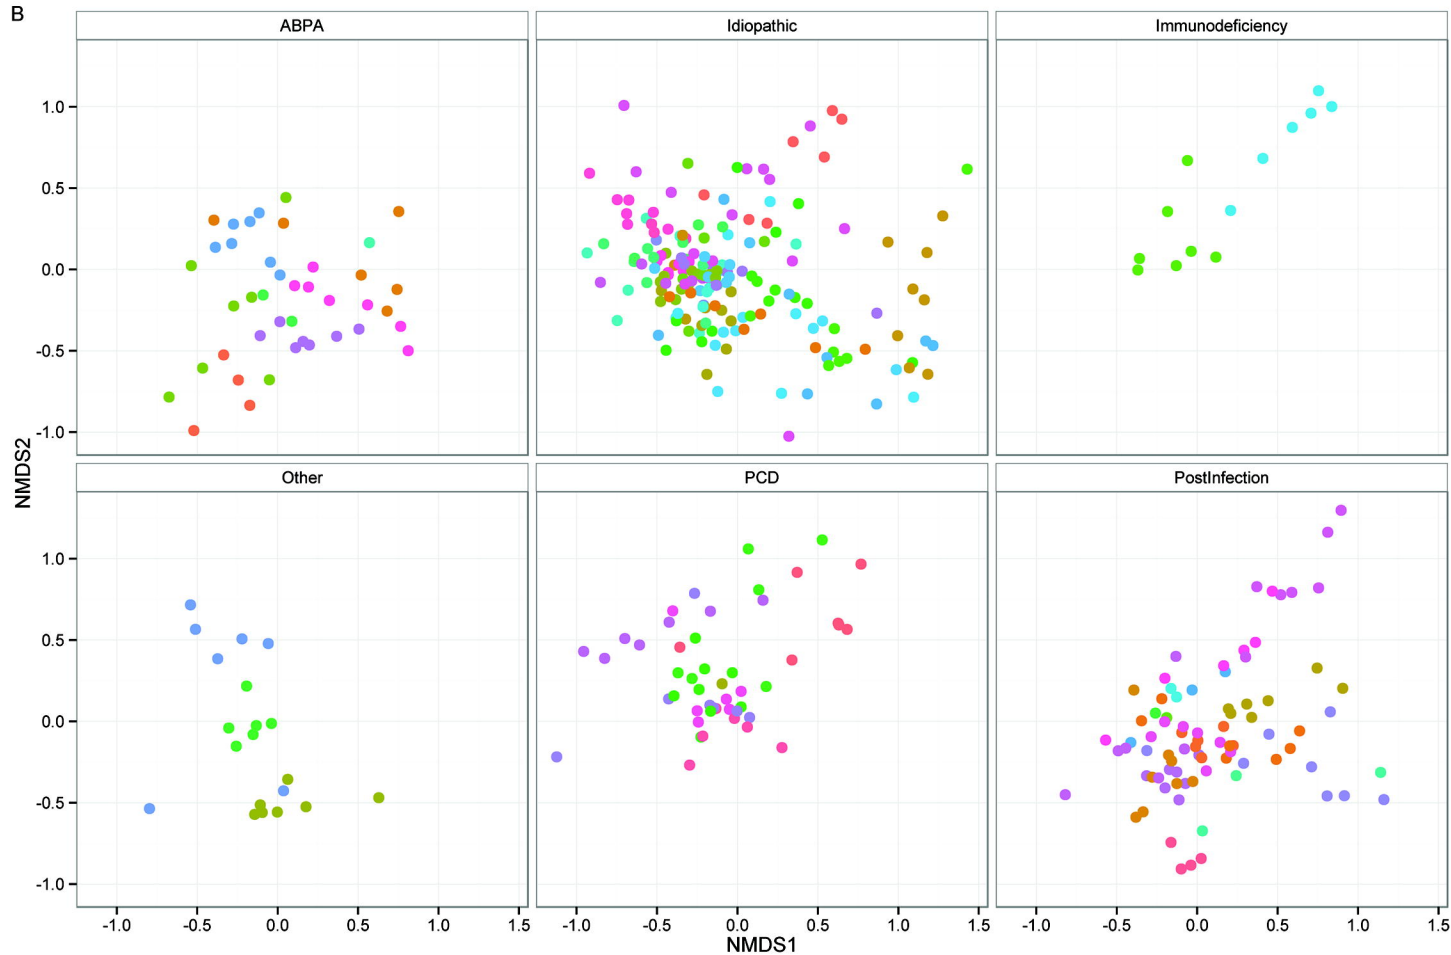

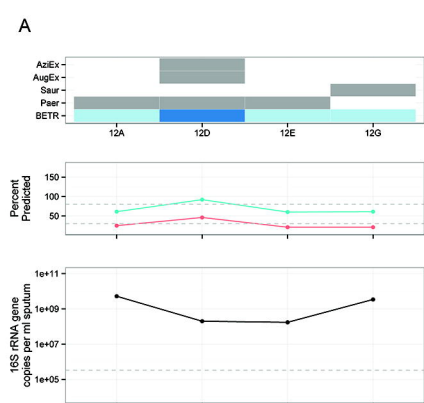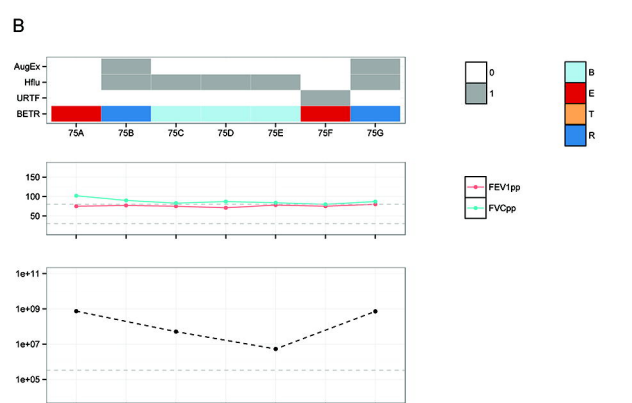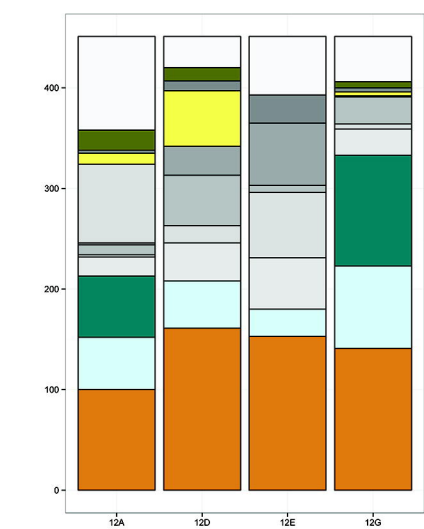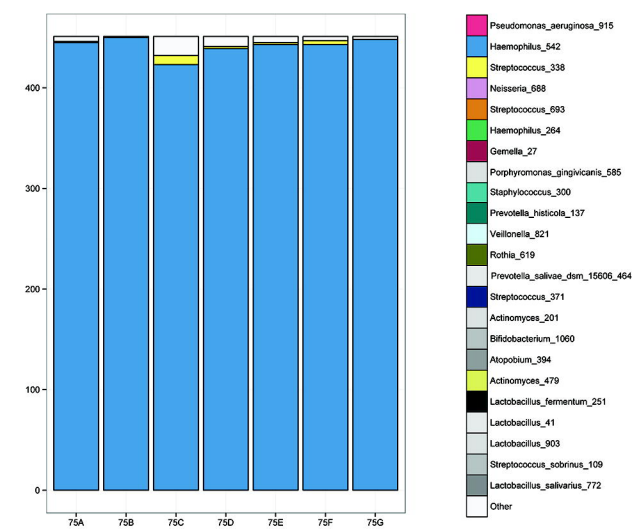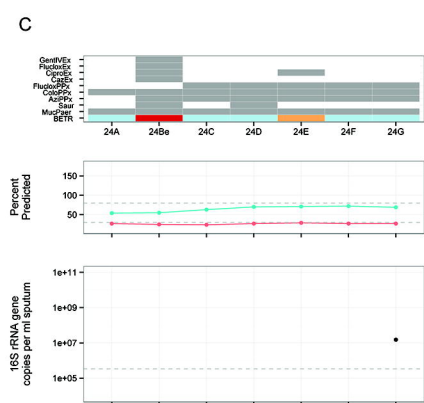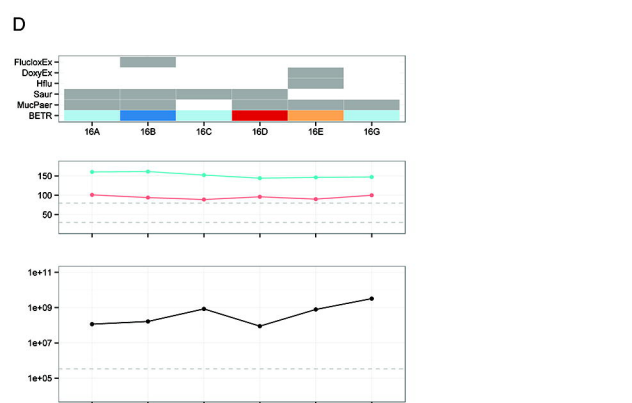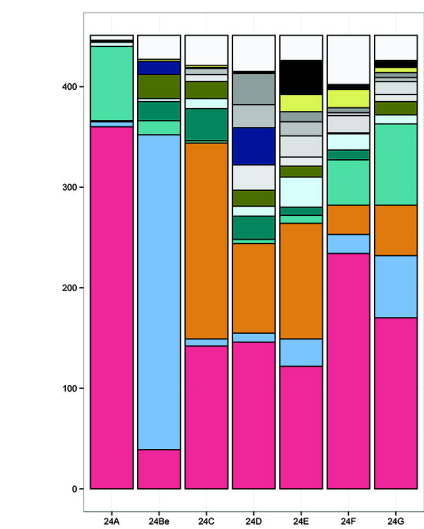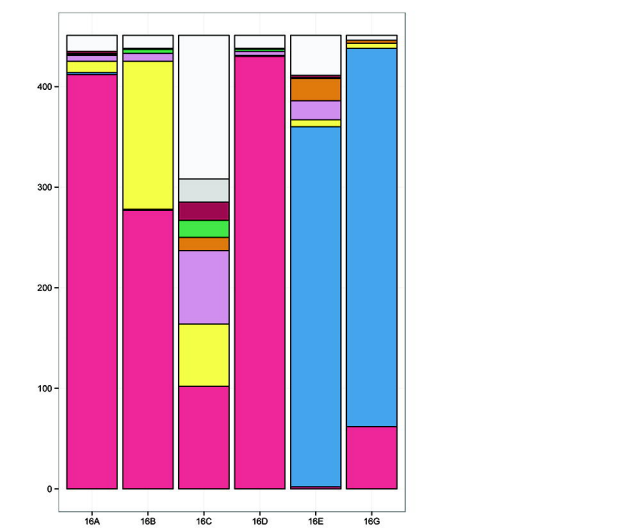

- Pseudomonas\_aeruginosa\_915
- Haemophilus\_542
- Streptococcus\_338
- Noisseria\_688
- Streptococcus\_693
- Haemophilus\_284
- Gemella\_27
- Porphyromonas\_gingivivicanis\_585
- Staphylococcus\_300
- Prevotella\_histicola\_137
- Veillonella\_821
- Rothia\_619
- Prevotella\_salivae\_dsm\_15606\_464
- Streptococcus\_371
- Actinomyces\_201
- Bifidobacterium\_1060
- Atopobium\_394
- Actinomyces\_479
- Lactobacillus\_fermentum\_251
- Lactobacillus\_41
- Lactobacillus\_903
- Streptococcus\_sobrinus\_109
- Lactobacillus\_salivarius\_772
- Other
